# Supplementary material for: Supramolecular isomers in the same crystal: a new type of entanglement involving ribbons of rings and 2D (4,4) networks polycatenated in a 3D architecture
Source: Royal Society of Chemistry journal article supplement (doi:10.1039/b418392d), 2005-01-01
Supplement: b418392d.pdf [file b418392d.pdf]

## Syntheses of compounds 1-4

### 1. Synthesis of $[\text{Cd}_3(\text{bbtz})_6(\text{H}_2\text{O})_6](\text{BF}_4)_6 \cdot 2\text{H}_2\text{O}$ (1)

A methanolic solution (20 ml) of 1,4-bis(1,2,4-triazol-1-ylmethyl)benzene (bbtz) (0.096 g, 0.4 mmol) was added slowly to an aqueous solution (10 ml) of  $\text{Cd}(\text{BF}_4)_2 \cdot 6\text{H}_2\text{O}$  (0.394 g, 1.0 mmol) with stirring. The resulting solution was filtered and the filtrate was allowed to stand in air at room temperature. After one week, the well-shaped colourless single crystals  $[\text{Cd}_3(\text{bbtz})_6(\text{H}_2\text{O})_6](\text{BF}_4)_6 \cdot 1.75\text{H}_2\text{O}$  (1) were obtained. Yield: 0.136 g (83%). Found: C, 35.31; H, 3.57; N, 20.46. Calcd. for  $\text{C}_{72}\text{H}_{87.5}\text{B}_6\text{Cd}_3\text{F}_{24}\text{N}_{36}\text{O}_{7.75}$  (1): C, 35.45; H, 3.62; N, 20.68%.

### 2. Synthesis of $[\text{Cd}(\text{bbtz})_2(\text{H}_2\text{O})_2](\text{BF}_4)_2 \cdot 3\text{DMF}$ (2)

$[\text{Cd}_3(\text{bbtz})_6(\text{H}_2\text{O})_6](\text{BF}_4)_6 \cdot 2\text{H}_2\text{O}$  (1) (0.073 g, 0.03 mmol) was dissolved in 10 ml DMF. After two weeks, the well-shaped colourless single crystals  $[\text{Cd}(\text{bbtz})_2(\text{H}_2\text{O})_2](\text{BF}_4)_2 \cdot 3\text{DMF}$  (2) were obtained. Yield: 0.086 g (93%). Found: C, 38.67; H, 4.72; N, 20.38. Calcd. for  $\text{C}_{33}\text{H}_{49}\text{B}_2\text{CdF}_8\text{N}_{15}\text{O}_5$  (2): C, 38.79; H, 4.83; N, 20.56%.

### 3. Synthesis of $[\text{Cd}(\text{bbtz})_2(\text{H}_2\text{O})_2](\text{ClO}_4)_2 \cdot 2\text{H}_2\text{O}$ (3)

A methanolic solution (20 ml) of 1,4-bis(1,2,4-triazol-1-ylmethyl)benzene (bbtz) (0.096 g, 0.4 mmol) was added slowly to an aqueous solution (10 ml) of  $\text{Cd}(\text{ClO}_4)_2 \cdot 6\text{H}_2\text{O}$  (0.419 g, 1.0 mmol) with stirring. The resulting solution was filtered and the filtrate was allowed to stand in air at room temperature. After several days, the well-shaped colourless single crystals  $[\text{Cd}(\text{bbtz})_2(\text{H}_2\text{O})_2](\text{ClO}_4)_2 \cdot 2\text{H}_2\text{O}$  (3) were obtained. Yield: 0.149 g (86%). Found: C, 33.29; H, 3.71; N, 19.42. Calcd. for  $\text{C}_{24}\text{H}_{32}\text{CdCl}_2\text{N}_{12}\text{O}_{12}$  (3): C, 33.37; H, 3.73; N, 19.46%.

### 4. Synthesis of $[\text{Cd}(\text{bbtz})_2(\text{H}_2\text{O})_2](\text{ClO}_4)_2 \cdot 3\text{DMF}$ (4)

$[\text{Cd}(\text{bbtz})_2(\text{H}_2\text{O})_2](\text{ClO}_4)_2 \cdot 2\text{H}_2\text{O}$  (3) (0.086 g, 1.0 mmol) was dissolved in 10 ml DMF. After two weeks, the well-shaped colourless single crystals  $[\text{Cd}(\text{bbtz})_2(\text{H}_2\text{O})_2](\text{ClO}_4)_2 \cdot 3\text{DMF}$  (4) were obtained. Yield: 0.097 g (93 %). Found: C, 37.78; H, 4.67; N, 19.95. Calcd. for  $\text{C}_{33}\text{H}_{49}\text{CdCl}_2\text{N}_{15}\text{O}_{13}$  (4): C, 37.85; H, 4.72; N, 20.07%.
